# Supplementary material for: High-efficiency oxygen evolution catalyzed by Sn–Co–Ni phosphide with oriented crystal phases
Source: Royal Society of Chemistry journal article supplement (doi:10.1039/d2ta03181g), 2022-01-01
Supplement: d2ta03181g1.pdf [file d2ta03181g1.pdf]

## Electronic Supplementary Information

### High-efficiency oxygen evolution catalyzed by Sn-Co-Ni phosphide with oriented crystal phases

Xin Liu,<sup>a</sup> Jun Huang,<sup>b,c</sup> Tongtong Li,<sup>\*a</sup> Wei Chen,<sup>\*b</sup> Guangliang Chen,<sup>\*a</sup> Liting Han<sup>b</sup> and Kostya (Ken) Ostrikov<sup>c</sup>

<sup>a</sup>School of Materials Science and Engineering, Zhejiang Sci-Tech University, Hangzhou 310018, P. R. China

\*E-mail: glchen@zstu.edu.cn; yitaji@zstu.edu.cn

<sup>b</sup>School of Physics and Electronic Information, Gannan Normal University, Ganzhou, Jiangxi 341000, P. R. China

\*E-mail: chwbetter@163.com

<sup>c</sup>School of Chemistry and Physics, Centre for Materials Science, Centre for Clean Energy Technologies and Practices, Centre for Waste-free World, Queensland University of Technology (QUT), Brisbane, QLD 4000, Australia

# 1. Experimental

## 1.1 Chemicals and Reagents

Ni-Co foam (NCF, thickness: 1 mm) with different Ni/Co ratios (1:8, 1:7, 1:6) was purchased from Suzhoutaili Co., Ltd. Ethyl alcohol ( $\text{CH}_3\text{CH}_2\text{OH}$ ,  $\geq 99.7\%$ ), acetone ( $\text{CH}_3\text{COCH}_3$ ,  $\geq 99.5\%$ ), stannous chloride dihydrate ( $\text{SnCl}_2 \cdot 2\text{H}_2\text{O}$ ), sulfuric acid ( $\text{H}_2\text{SO}_4$ ,  $\geq 99.5\%$ ), red phosphorus ( $\text{P}_4$ , 98.5%), potassium hydroxide ( $\text{KOH}$ ,  $\geq 85.0\%$ ), carbon electrode (6 mm), and ruthenium oxide ( $\text{RuO}_2$ , 99.9%) were purchased from the Hangzhou Minling Chemical Instrument Co., Ltd. Deionized water was used in all experiments, and all the chemical reagents were of analytical grade.

## 1.2 *In-situ* fabrication of Sn/NCF

Before the electro-deposition, the NCF ( $1 \times 1$  cm) was cleaned with acetone and 10 % wt hydrochloric acid solution for 15 min in an ultrasound bath, and followed by three times of cleaning with ethanol and deionized water. Then, the Sn nano-particles were grown on the NCF at -0.6 V in three-electrode system for 100 s. The NCF was used as working electrode, while carbon electrode and  $\text{Hg}/\text{Hg}_2\text{Cl}_2$  were served as counter and reference electrode, respectively. The whole electrode setup was dipped into 30 mL of electrolyte solution composed of 0.03 M  $\text{SnCl}_2 \cdot \text{H}_2\text{O}$  and 0.5 M  $\text{H}_2\text{SO}_4$ . The resulting sample was washed with deionized water for three times. Lastly, the Sn/NCF sample was dried in an oven with a temperature of 40 °C for 1 h. For comparison, the samples with different Ni/Co ratio, electro-deposition potential, electro-deposition time and electrolyte concentration were also fabricated with similar conditions.

## 1.3 Synthesis of SnPi@CoP-Ni<sub>5</sub>P<sub>4</sub>/NCF samples

The as-prepared Sn/NCF and 0.3 g red phosphorus powders were respectively placed at downstream and upstream of the porcelain boat in a chemical vapor deposition (CVD) system. Subsequently, the samples were heated to 550 °C with a heating rate of 5 °C/min and maintained for 2.5 h in the P + N<sub>2</sub> (Pressure: 50 Pa). After the phosphorization process, the sample was cooled down to the environment temperature under N<sub>2</sub> (25 sccm) flow, and labelled as SnPi@CoP-Ni<sub>3</sub>P<sub>4</sub>/NCF sample. For comparison, the sample was also obtained with the different reactive conditions in the CVD system, such as different reaction temperature, reaction time, and amount of red phosphorus.

#### **1.4 Synthesis of NiCoP<sub>x</sub>/NCF samples**

The as-cleaned NCF and 0.3 g red phosphorus powders were placed at downstream and upstream of the porcelain boat in a chemical vapor deposition (CVD) system, respectively. Subsequently, the samples were heated to 550 °C with a heating rate of 5 °C/min and maintained for 2.5 h in the P + N<sub>2</sub> (Pressure: 50 Pa). After phosphorization process, the sample was cooled down to the environmental temperature under N<sub>2</sub> (25 sccm) flow, and labelled as NiCoP<sub>x</sub>/NCF sample.

#### **1.5 Synthesis of Ni<sub>2</sub>O<sub>3</sub>-CoSnO<sub>3</sub>/NCF samples**

The Sn/NCF precursor was placed at the porcelain boat in a chemical vapor deposition (CVD) system. Subsequently, the samples were heated to 550 °C with a heating rate of 5 °C/min and maintained for 2.5 h in the N<sub>2</sub> (Pressure: 50 Pa). After high-temperature reaction process, the sample was cooled down to the environment temperature under N<sub>2</sub> (25 sccm) flow, and labelled as Ni<sub>2</sub>O<sub>3</sub>-CoSnO<sub>3</sub>/NCF sample.

#### **1.6 Materials characterization**

The physico-chemical structures of the catalysts are investigated with following instruments. The surface morphology was characterized by using the field-emission scanning electron microscopy (FE-SEM, JSM-6700F, Japan) and transmission electron microscopy (TEM, Model JSM-2100, JEOL, Japan). The energy dispersive spectroscopy (EDS) elemental maps were produced by the aberration-corrected high angle annular dark field scanning transmission electron-microscopy (HAADF-STEM, FEI Titan G2, USA) with an operating voltage of 300 kV. The crystal phases and chemical state were determined by the X-ray diffractometer (XRD, Thermo Fisher Scientific, USA) equipped a Cu K $\alpha$  radiation source (35 kV) and the X-ray photoelectron spectroscopy (XPS, K-Alpha, USA) with the X-ray source (Al K $\alpha$ : 1486.6 eV). The frame structures of catalysts before and after a long-time electrocatalytic processes were checked by a Raman spectroscope (Model: Lab Ram HRUV).

## 1.7 Electrochemical measurements

The electrocatalytic performances of the produced samples were measured with a conventional electrochemical workstation (Model CHI 660E, Shanghai Chenhua Instrument Co., Ltd.), whereas the sample, Hg/Hg<sub>2</sub>Cl<sub>2</sub> (saturated KCl solution) and carbon rod (6 mm) acted as working, reference and counter electrodes in alkaline electrolyte (1 M KOH, pH 14), respectively. The measured potential is converted to RHE according to the following equation:

$$E \text{ vs RHE} = E \text{ vs Hg/Hg}_2\text{Cl}_2 + 0.241 + 0.059 \text{ pH.}$$

The resulting polarization curves were  $iR$ -compensated according to the equation:

$$E_c = E_m - iR_s,$$

where  $E_c$  is the corrected potential,  $E_m$  is the measured potential experimentally,  $R_s$  is the resistance of the solution obtained from the curve. The working electrode was activated with the cyclic voltammetry (CV) scanning process at a scanning rate of 5 mV s<sup>-1</sup>. The linear sweep voltammetry (LSV) curves were

measured with a scanning rate of 1 mV s<sup>-1</sup>. The electrochemical impedance spectrum (EIS) was recorded in the frequency range of 100 kHz ~ 0.01 Hz with a 5 mV AC voltage amplitude at different potentials. The electrocatalytic sustainability of the electrode quantified by the chronoamperometry test was analyzed with potentials of 0.053 V vs RHE (10 mA cm<sup>-2</sup>) and 0.085 V vs RHE (100 mA cm<sup>-2</sup>). The stability was determined by the CV measurement at a scan rate of 5 mV s<sup>-1</sup> and the long-term durability tests, respectively. For comparison, the NCF coated with RuO<sub>2</sub> with a same mass loading rate as the SnPi@CoP-Ni<sub>5</sub>P<sub>4</sub>/NCF (6.3 mg cm<sup>-2</sup>) acted as OER electrode, respectively. The electrochemical capacitance at non-Faraday potential (from -0.8 to -0.6 V vs Hg/Hg<sub>2</sub>Cl<sub>2</sub>) was measured by CV with different scanning speeds (e.g. 20, 60, 100, 140 and 180 mV s<sup>-1</sup>) to estimate the effective electrochemical surface area (ECSA) by calculating the double layer capacitance ( $C_{dl}$ ). Finally, the two-electrode electrolytic cell assembled with SnPi@CoP-Ni<sub>5</sub>P<sub>4</sub>/NCF was investigated to detect the electrocatalytic performances for overall water-splitting. The turnover frequency (TOF) for OER followed the equation:  $TOF = I/(4Fn)$ , where the  $I$ ,  $F$ , and  $n$  denote the current (A), the Faraday constant (C mol<sup>-1</sup>), and the number of active sites (mol), respectively. The factors of 1/4 or 1/2 are the corresponding electron transfer numbers. In addition, the mechanisms of OER enhancement is explored by *in-situ* Raman system on the inVia Reflex-Renishaw spectrometer (excitation wavelength 532 nm), and the sample was filled in a H-tape in situ cell provided by Beijing Scistar Technology Minling Co., Ltd.

## 1.8 Quantum chemistry simulation details

The simulations were calculated by spin-polarized first-principles DFT,<sup>S1</sup> which is provided by the Vienna an initio Simulation Package (VASP)<sup>S2</sup> with projector augmented wave (PAW).<sup>S3</sup> The generalized gradient approximation,<sup>S4</sup> developed by Perdew, Burke and Ernzerhof (GGA-PBE), was

used as the exchange correlation functional. The cut-off energy was set to 400 eV. Brillouin zones were sampled by a set of k points grid (3×3×1) according to the Monkhorst-Pack scheme, which has the convergence tolerance of energy changes of 10<sup>-5</sup> eV. The vdW interaction was introduced to treat the interaction between the molecules and the substrate, and it is described by a semiempirical correction by the DFT - D3 method.<sup>S5</sup> In addition, to evaluate the OER activity of the materials, we calculate the Gibbs free energy of coordinate elementary steps and overpotential for OER based on the following 4e mechanism proposed by Nørskov for water oxidation.<sup>S6</sup>

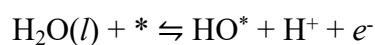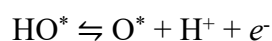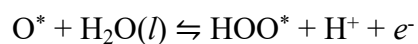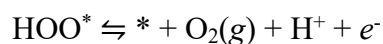

Here, the symbols “\*” denotes the active sites on the catalyst, (l) and (g) represents liquid and gas phases, respectively. In order to fully discuss the active facet of the catalyst, the (002) and (201) of CoP, the (203) of Ni<sub>5</sub>P<sub>4</sub> as well as the (222) of SnP<sub>2</sub>O<sub>7</sub> were considered.

## 2. Supplementary figures

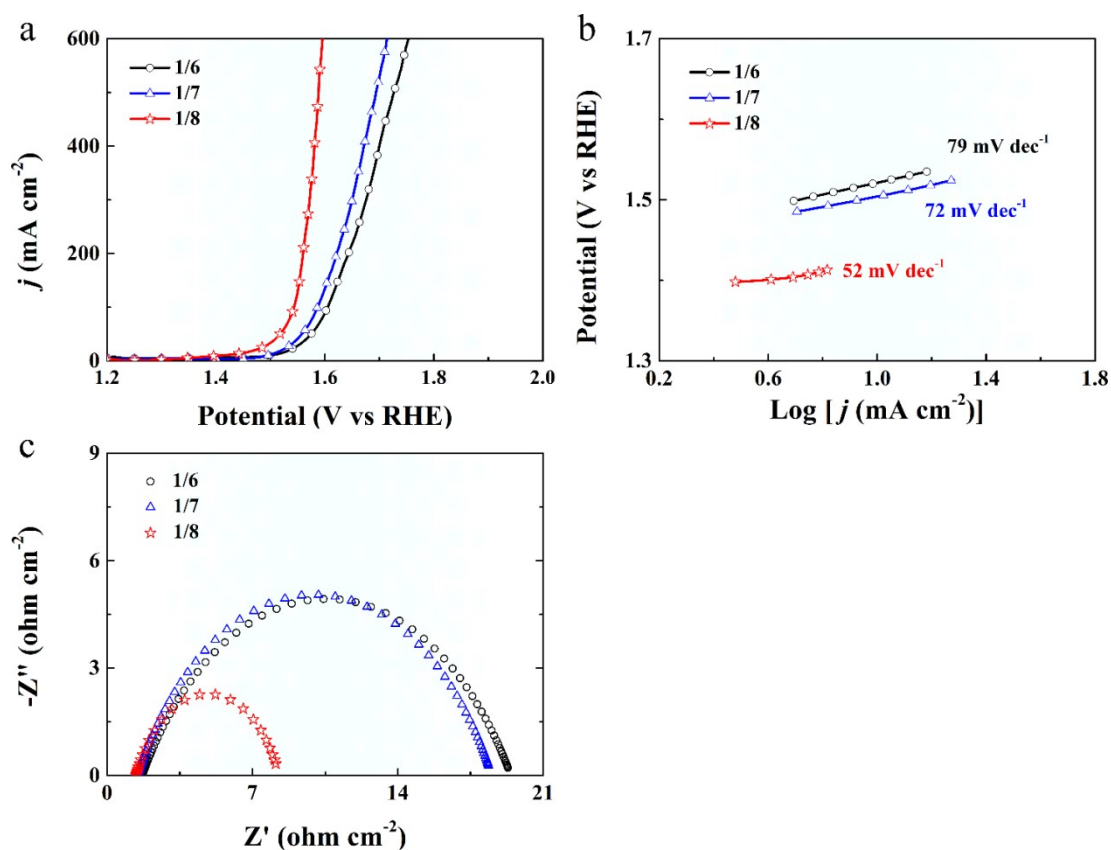

**Figure S1.** The effect of the different Ni/Co ratio substrate on the OER activity of SnPi@CoP-Ni<sub>5</sub>P<sub>4</sub>/NCF in 1.0 M KOH electrolyte. (a) LSV curves and the corresponding Tafel slopes (b), and Nyquist curves (c).

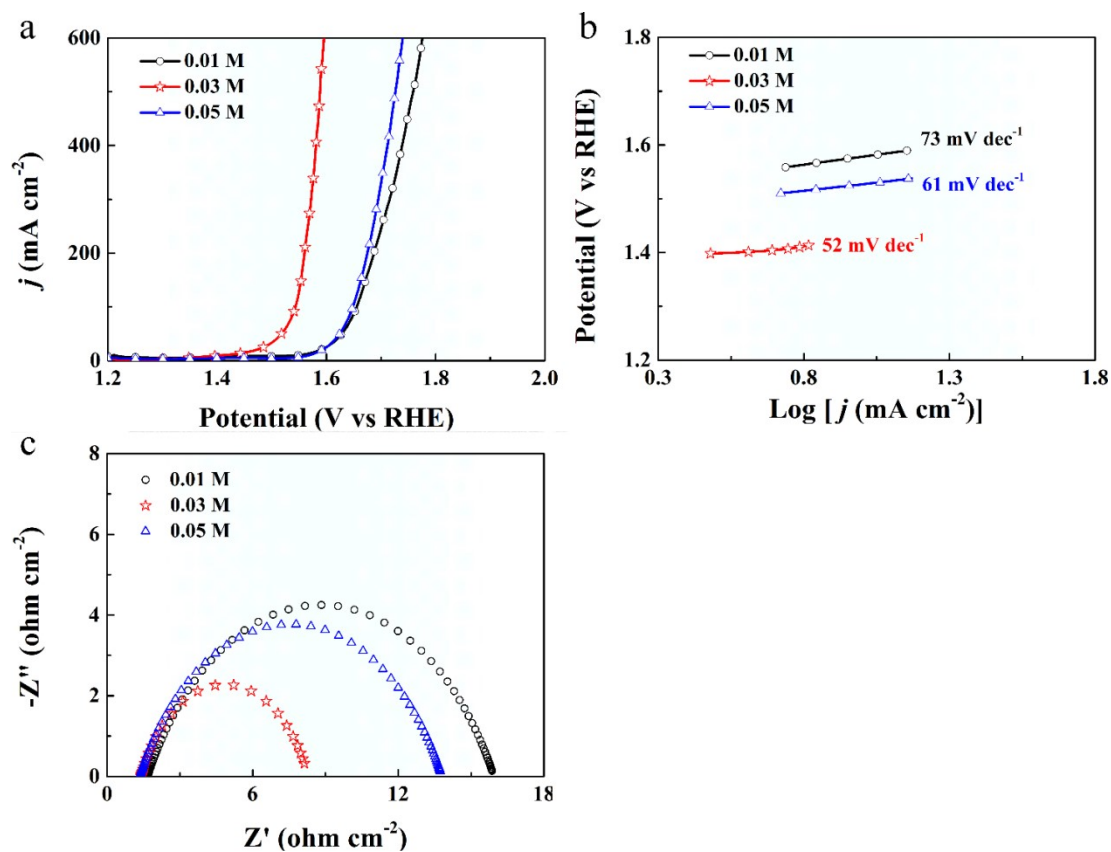

**Figure S2.** The effect of the electrodeposition solution concentration on the OER activity of SnPi@CoP-Ni<sub>5</sub>P<sub>4</sub>/NCF in 1.0 M KOH electrolyte. (a) LSV curves and the corresponding Tafel slopes (b), and Nyquist curves (c).



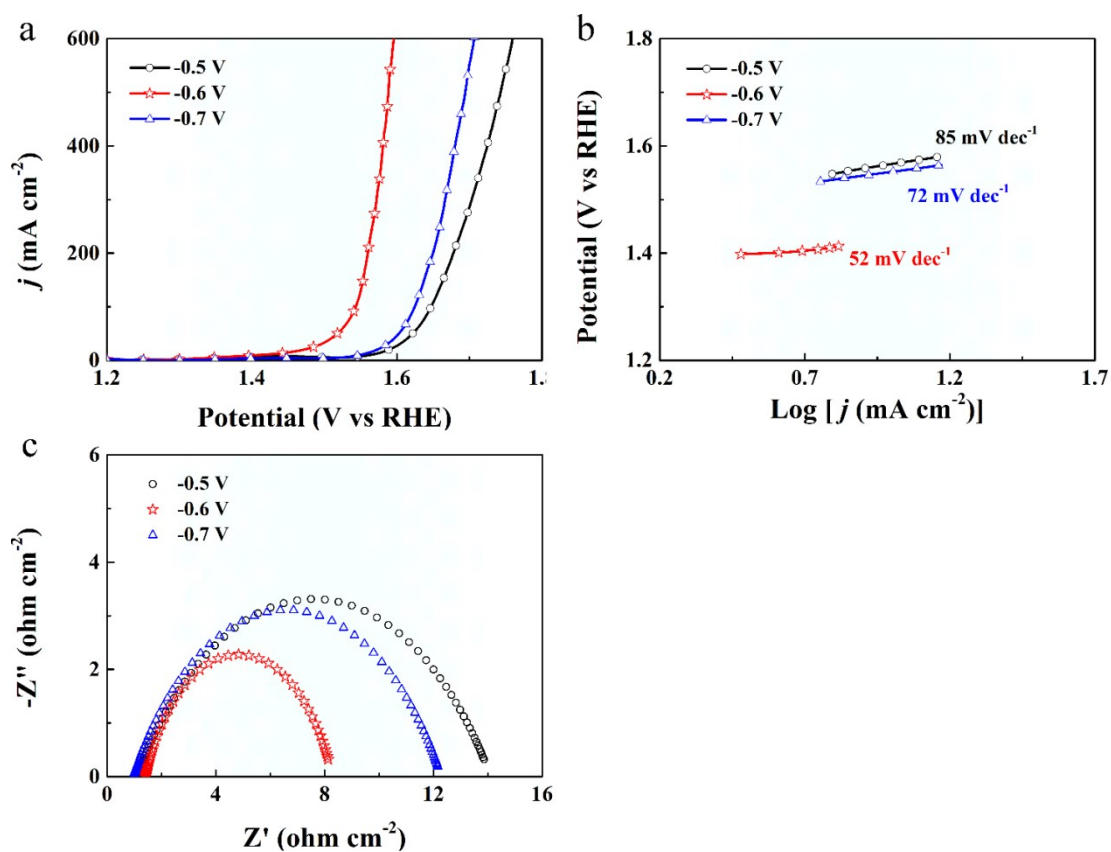

**Figure S3.** The effect of the electrodeposition potential on the OER activity of SnPi@CoP-Ni<sub>5</sub>P<sub>4</sub>/NCF in 1.0 M KOH electrolyte. (a) LSV curves and the corresponding Tafel slopes (b), and Nyquist curves (c).

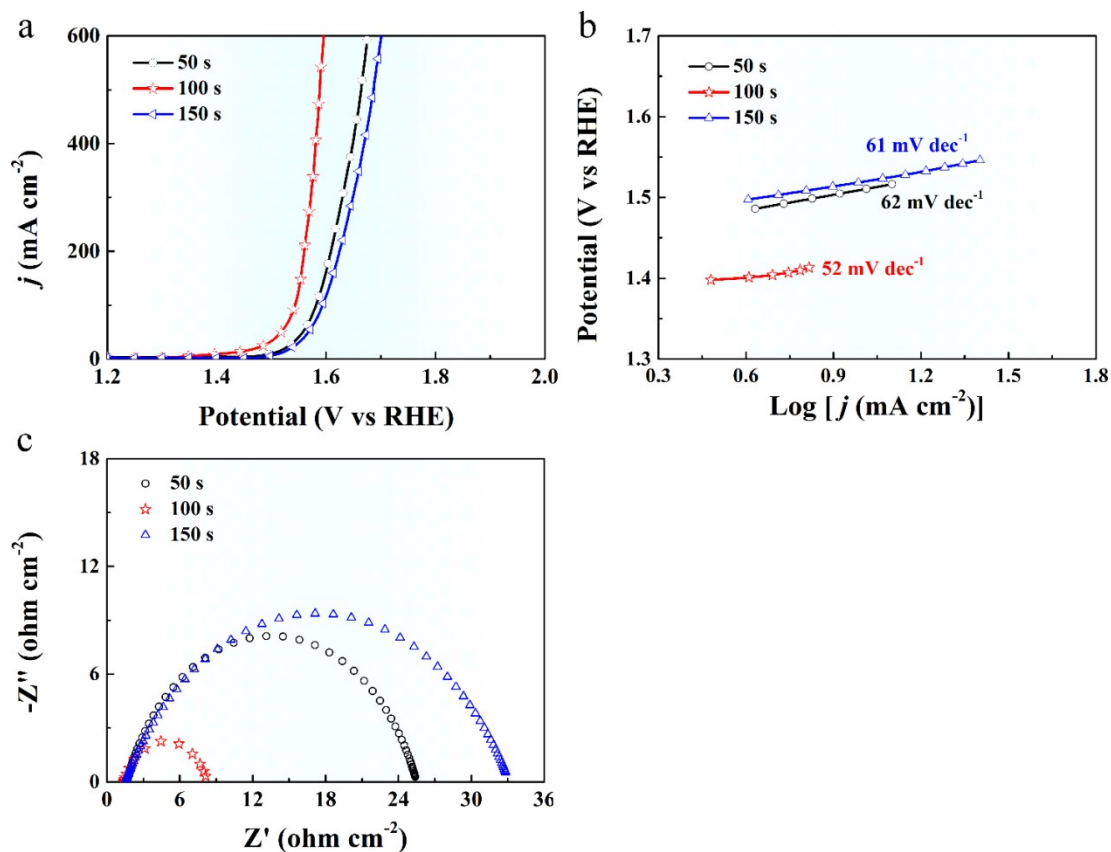

**Figure S4.** The effect of the electrodeposition time on the OER activity of SnPi@CoP-Ni<sub>5</sub>P<sub>4</sub>/NCF in 1.0 M KOH electrolyte. (a) LSV curves and the corresponding Tafel slopes (b), and Nyquist curves (c).

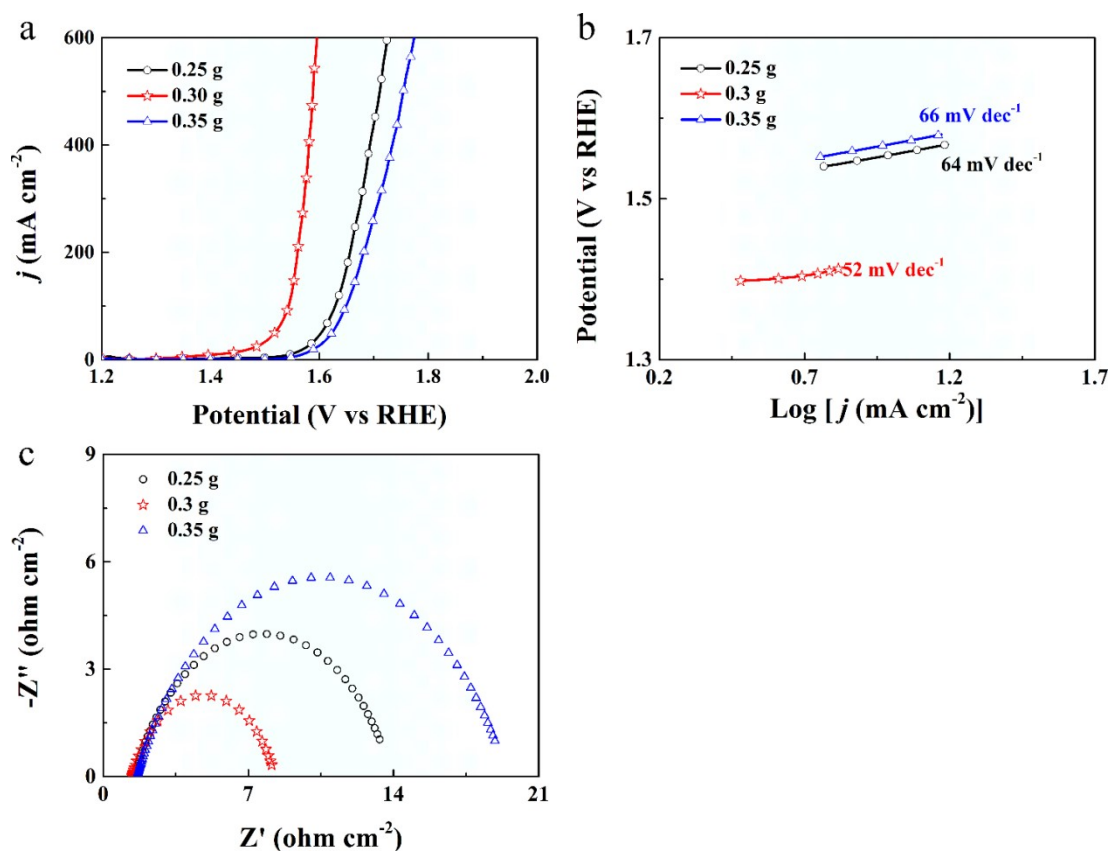

**Figure S5.** The effect of the red phosphorus mass on the OER activity of SnPi@CoP-Ni<sub>3</sub>P<sub>4</sub>/NCF in 1.0 M KOH electrolyte. (a) LSV curves and the corresponding Tafel slopes (b), and Nyquist curves (c).

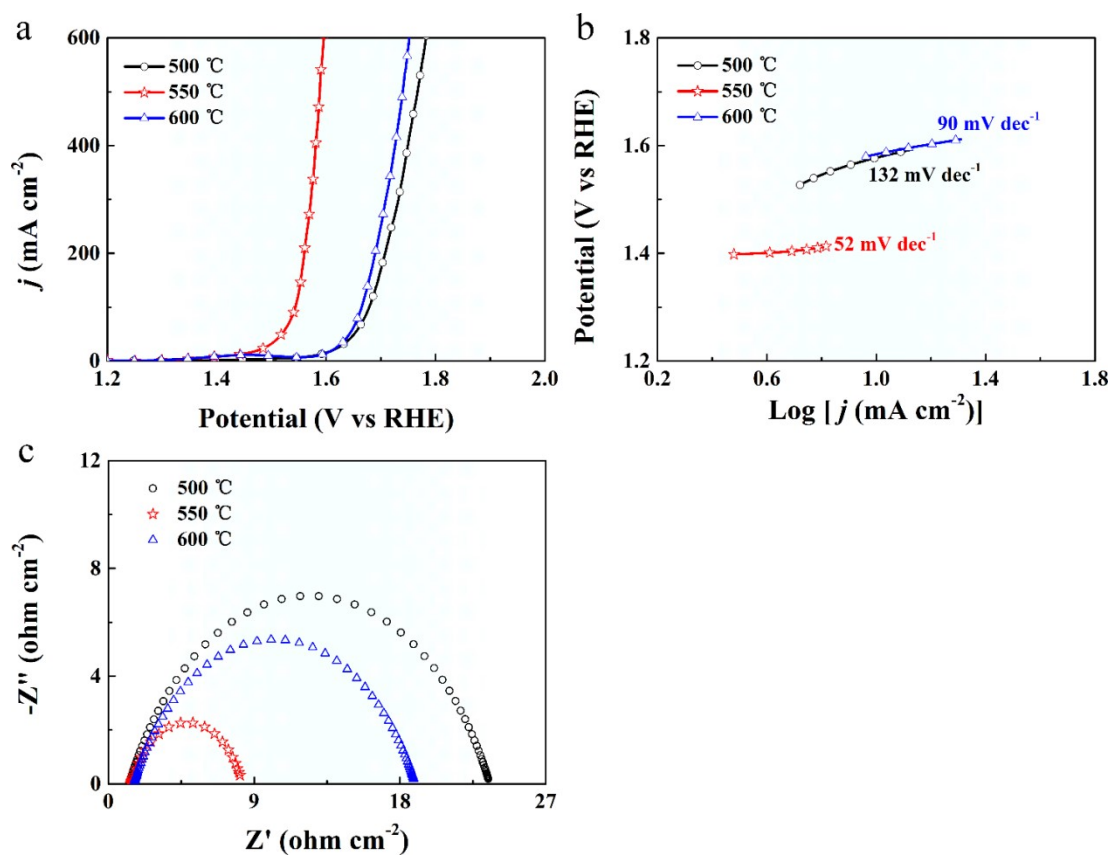

**Figure S6.** The influence of the phosphating reaction temperature on the OER activity of SnPi@CoP-Ni<sub>5</sub>P<sub>4</sub>/NCF sample in 1.0 M KOH. (a) LSV curves and the corresponding Tafel slopes (b), and Nyquist curves (c).

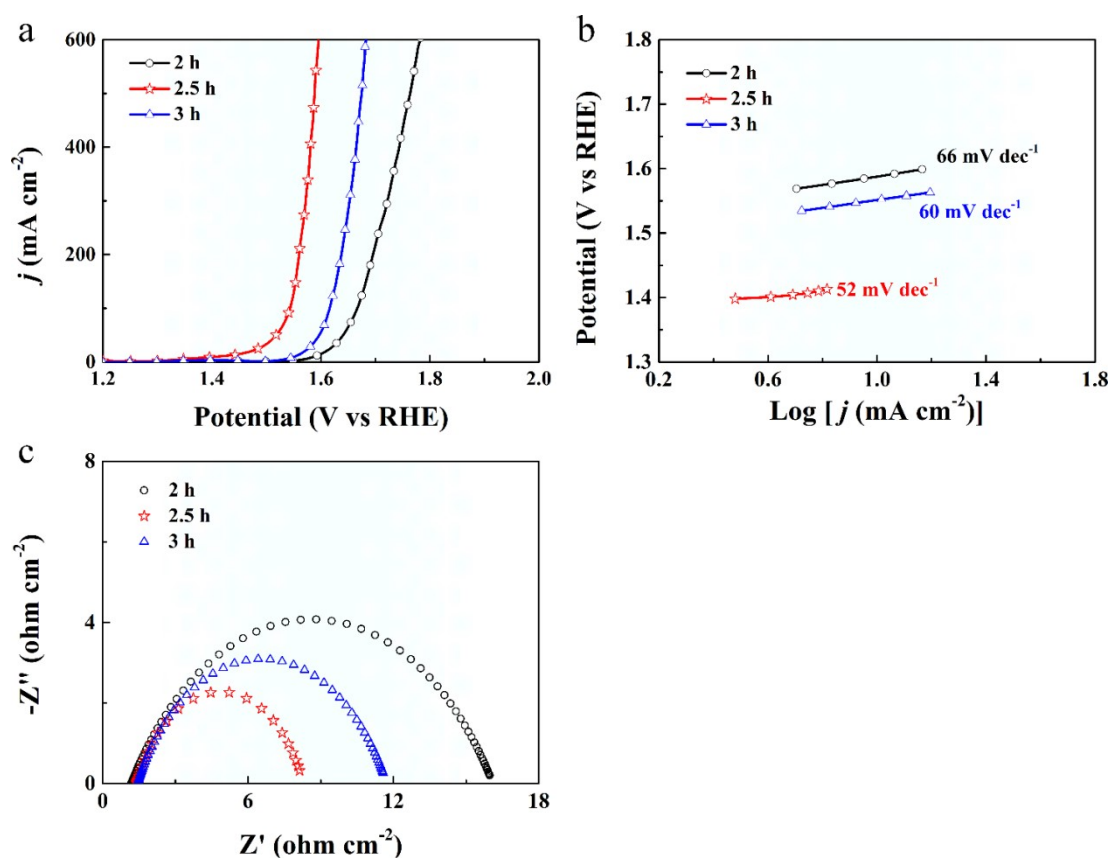

**Figure S7.** The influence of the phosphating reaction time on the OER activity of SnPi@CoP-Ni<sub>5</sub>P<sub>4</sub>/NCF sample in 1.0 M KOH. (a) LSV curves and the corresponding Tafel slopes (b), and Nyquist curves (c).

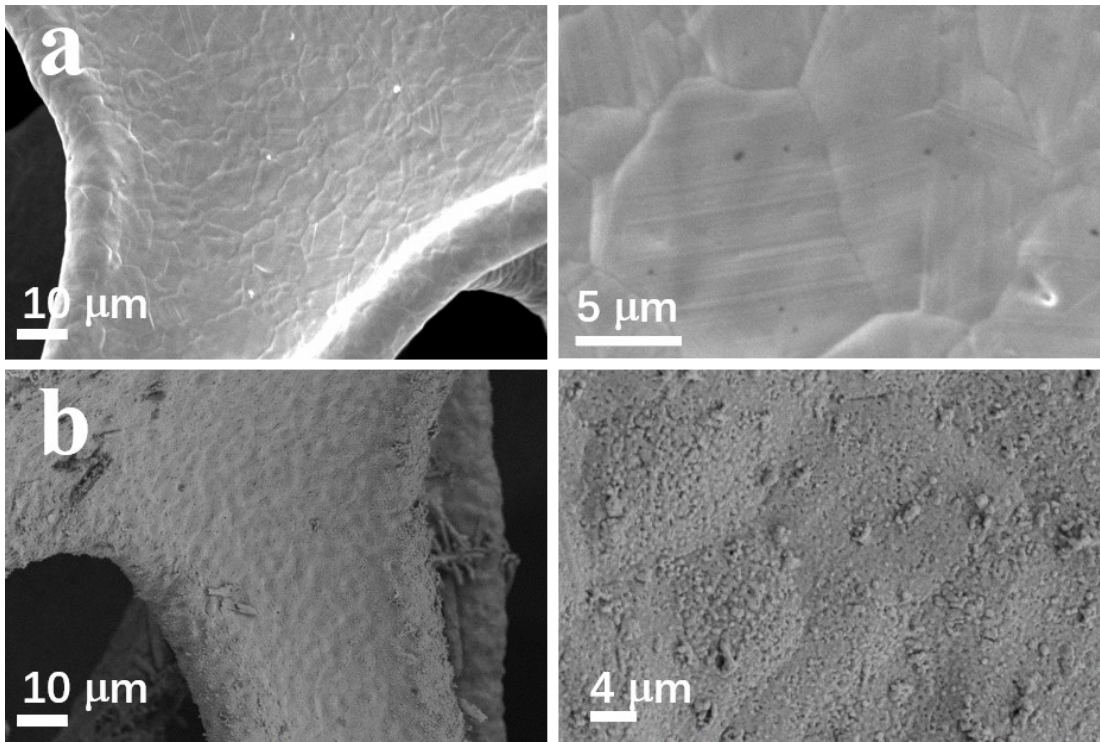

**Figure S8.** The SEM images of the fabricated Sn/NCF structure. (a) The original substrate, (b) Sn/NCF.

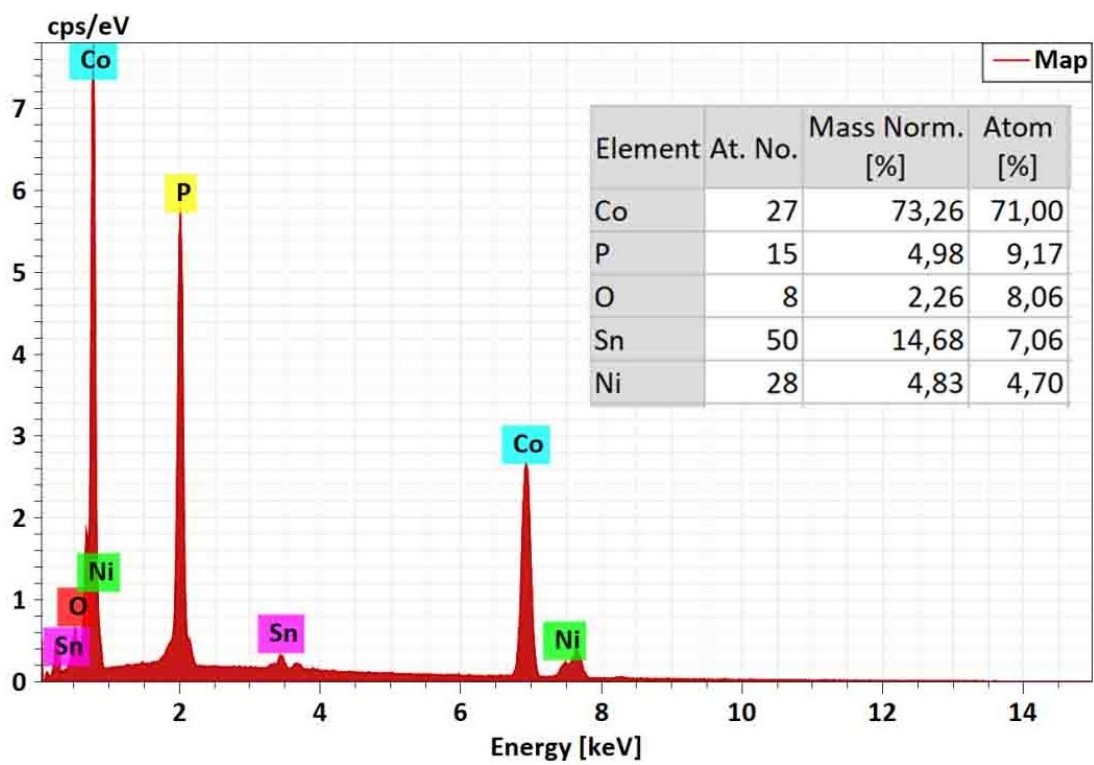

Figure S9. The energy dispersive spectroscopy (EDS) of SnPi@CoP-Ni<sub>5</sub>P<sub>4</sub>.

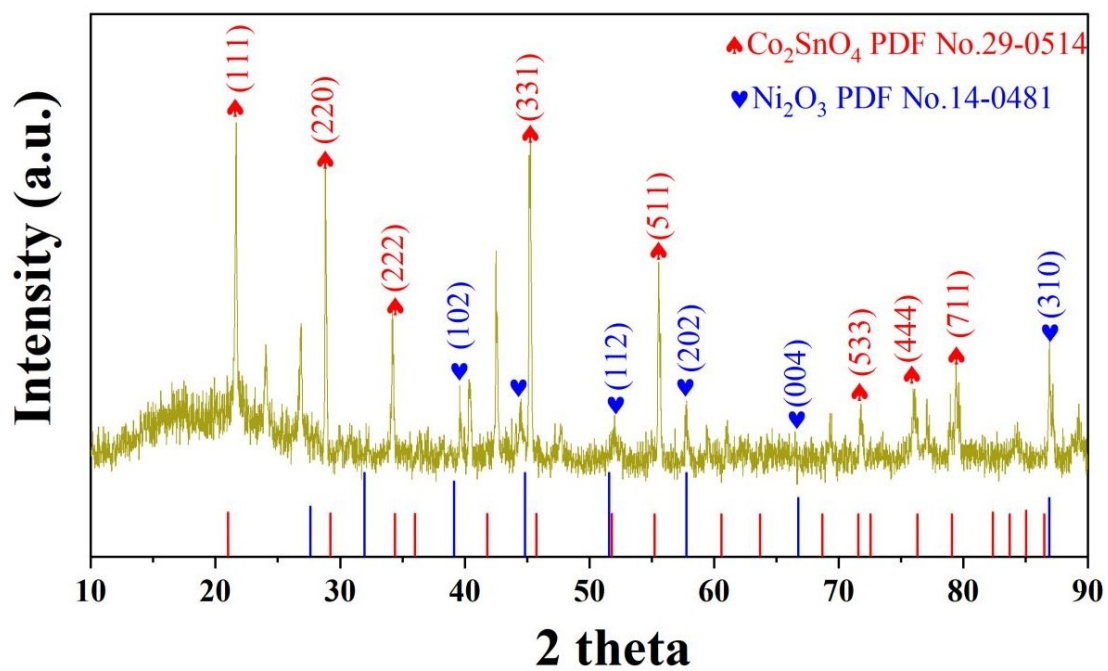

Figure S10. The XRD spectrum of the  $\text{Ni}_2\text{O}_3\text{-Co}_2\text{SnO}_4/\text{NCF}$  sample.



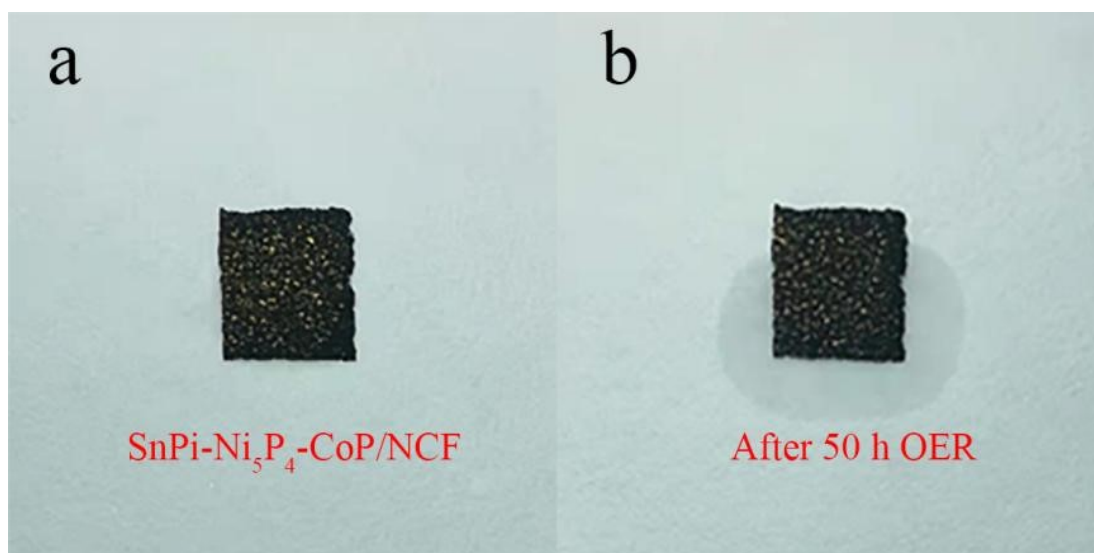

**Figure S11.** The macro-images of the SnPi@CoP-Ni<sub>5</sub>P<sub>4</sub>/NCF sample before (a) and after (b) 50 h OER tests at  $j_{10}$ .

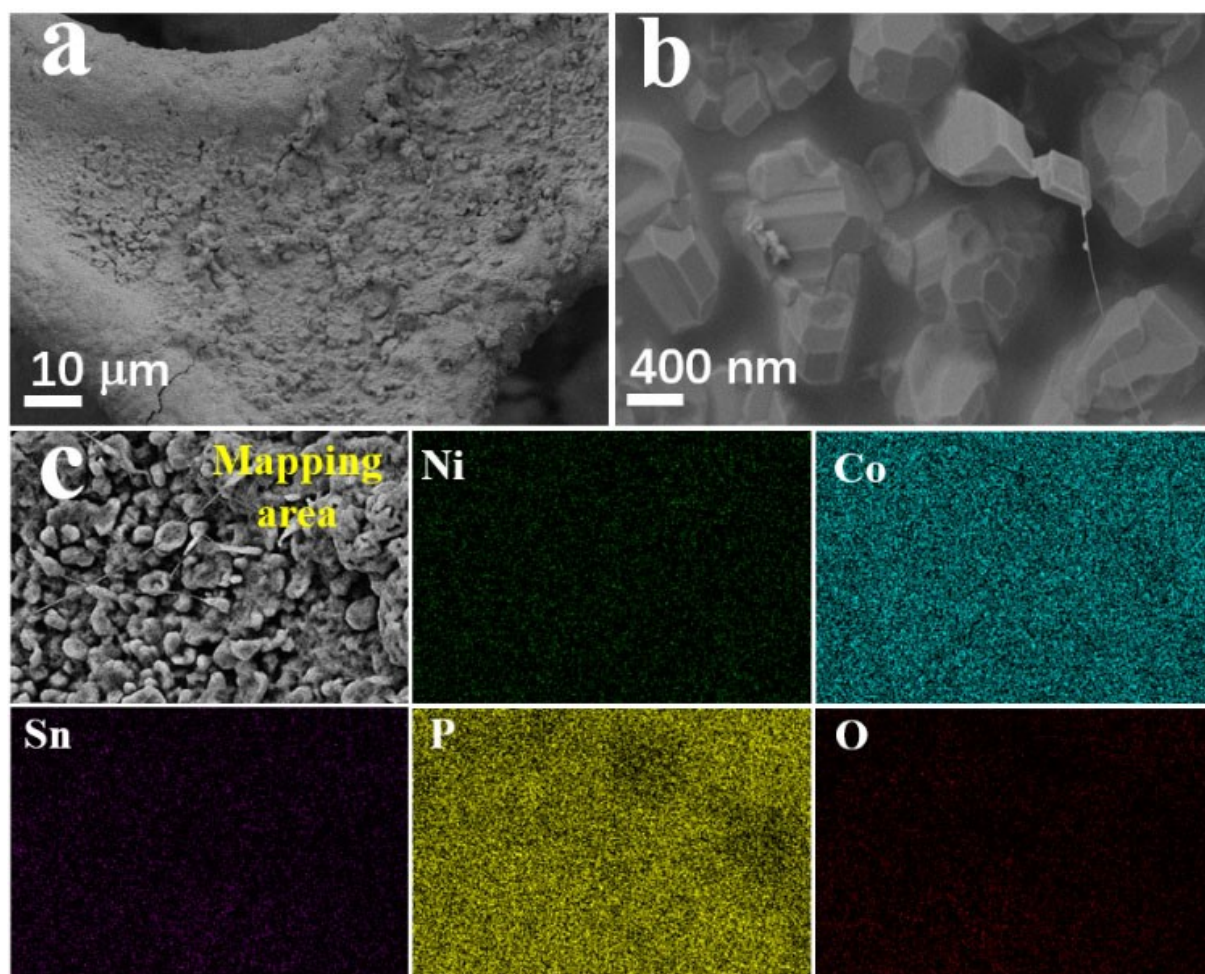

**Figure S12.** Physico-chemical structure characterization of the SnPi@CoP-Ni<sub>5</sub>P<sub>4</sub>/NCF sample after 50 h OER processes at a current density of  $j_{10}$ . (a) Low and (b) high resolution SEM images, (c) SEM mapping area of the sample and the corresponding distribution of Ni, Co, Sn, P and O elements, respectively.

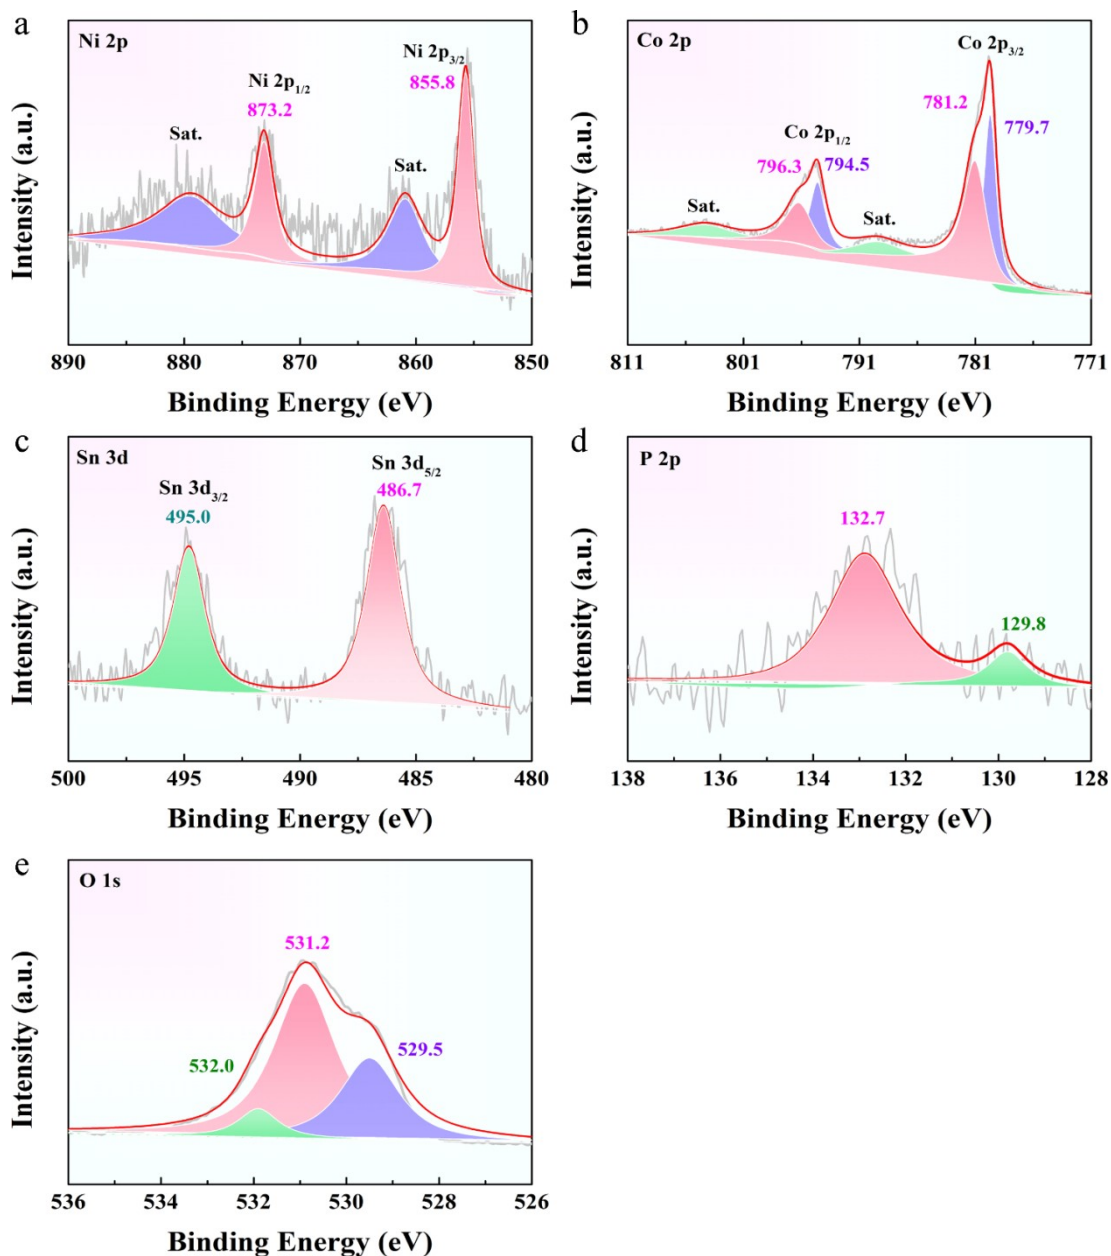

**Figure S13.** The XPS spectra of the SnPi@CoP-Ni<sub>5</sub>P<sub>4</sub>/NCF sample after 50 h OER process at the current density of 10 mA/cm<sup>2</sup>.

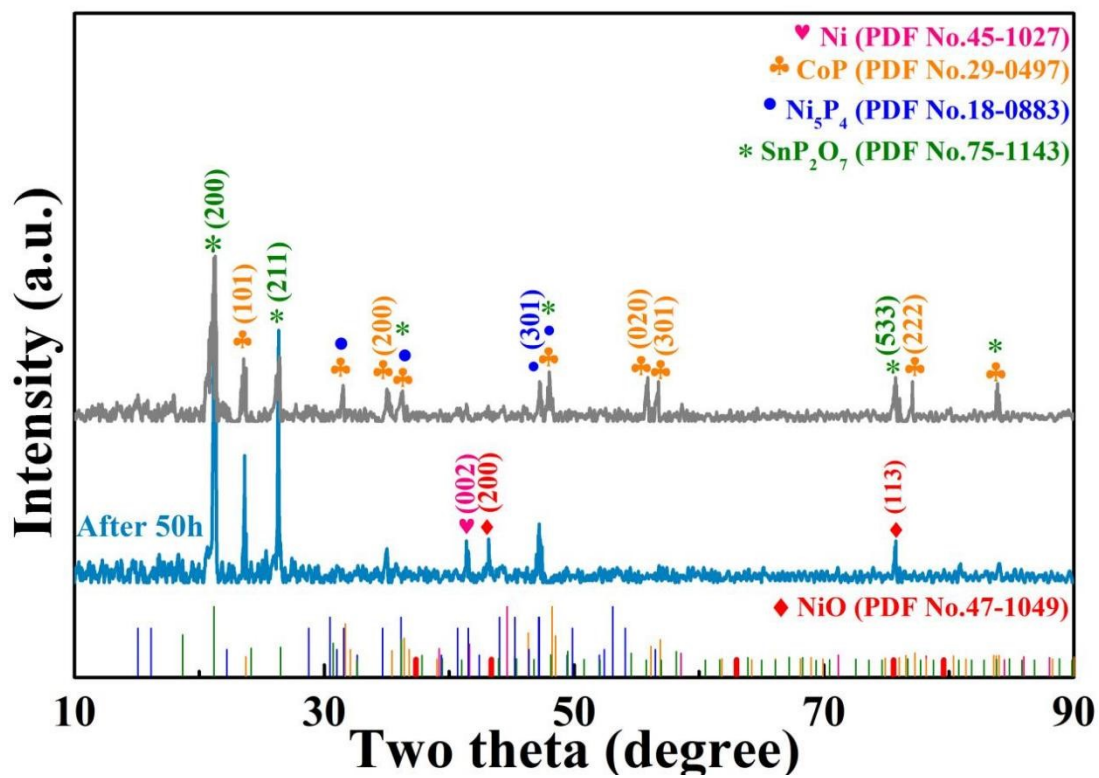

Figure S14. The XRD spectrum of the SnPi@CoP-Ni<sub>5</sub>P<sub>4</sub>/NCF sample after 50 h of the OER processes.

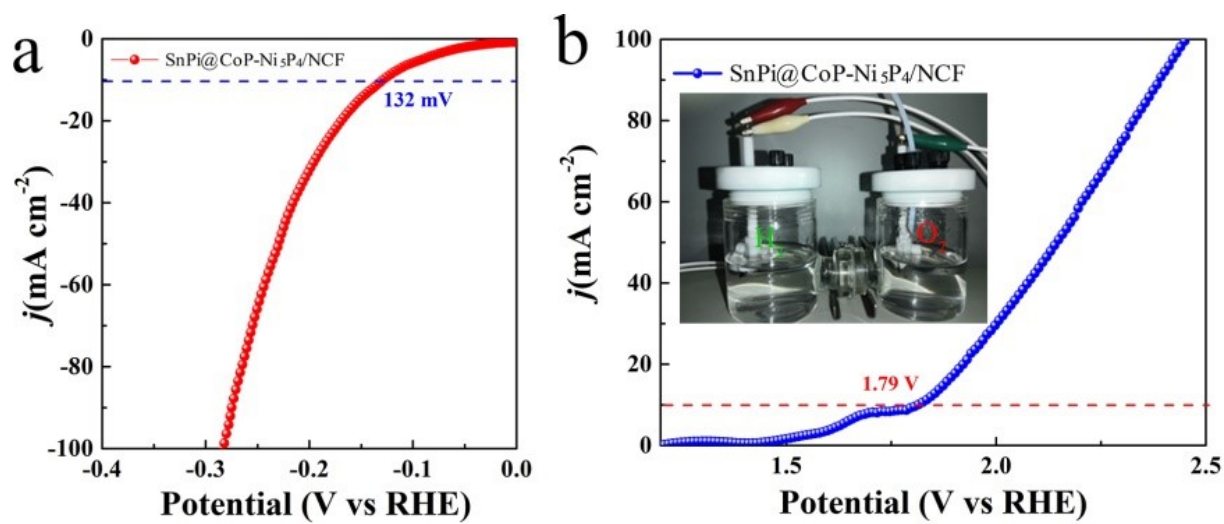

**Figure S15.** (a) Polarization curves of the SnPi@CoP-Ni<sub>5</sub>P<sub>4</sub>/NCF, (b) Performance of the bifunctional electrodes for overall water splitting; the inset is a photograph of the H-type cell.



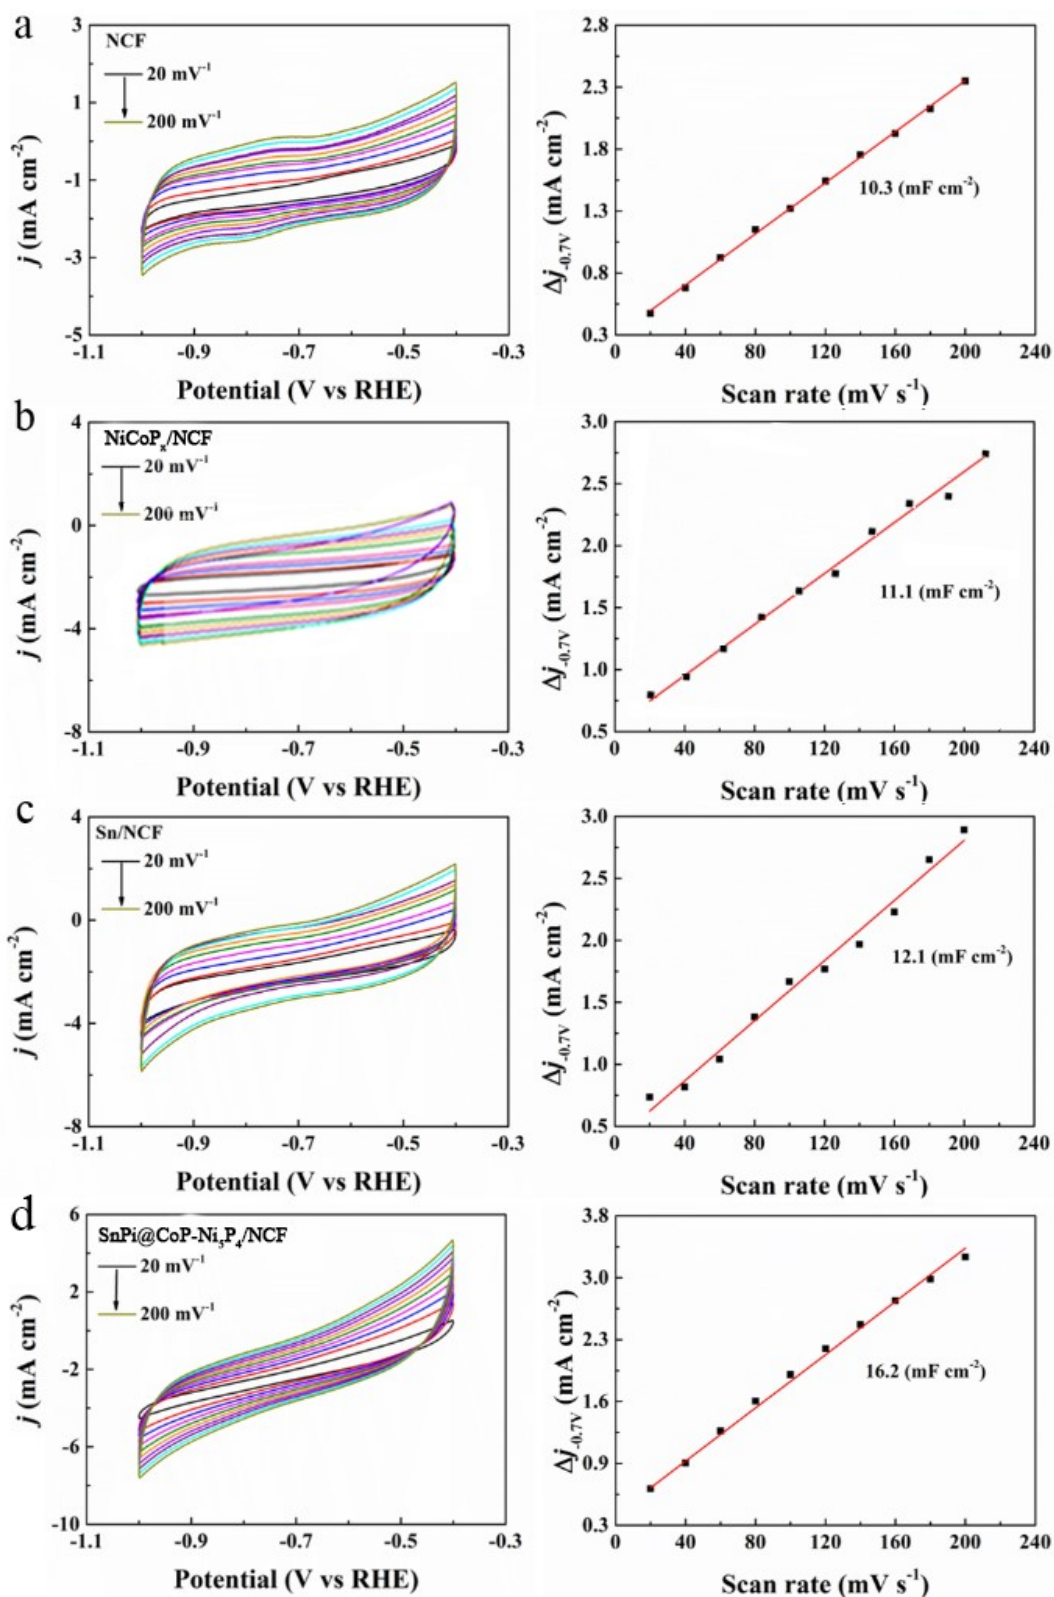

**Figure S16.** CV curves of the electrocatalysts with different scanning rate (left) and the corresponding  $C_{dl}$  (right). (a) NCF, (b) NiCoP<sub>x</sub>/NCF, (c) Sn/NCF, and (d) SnPi@CoP-Ni<sub>5</sub>P<sub>4</sub>/NCF samples.

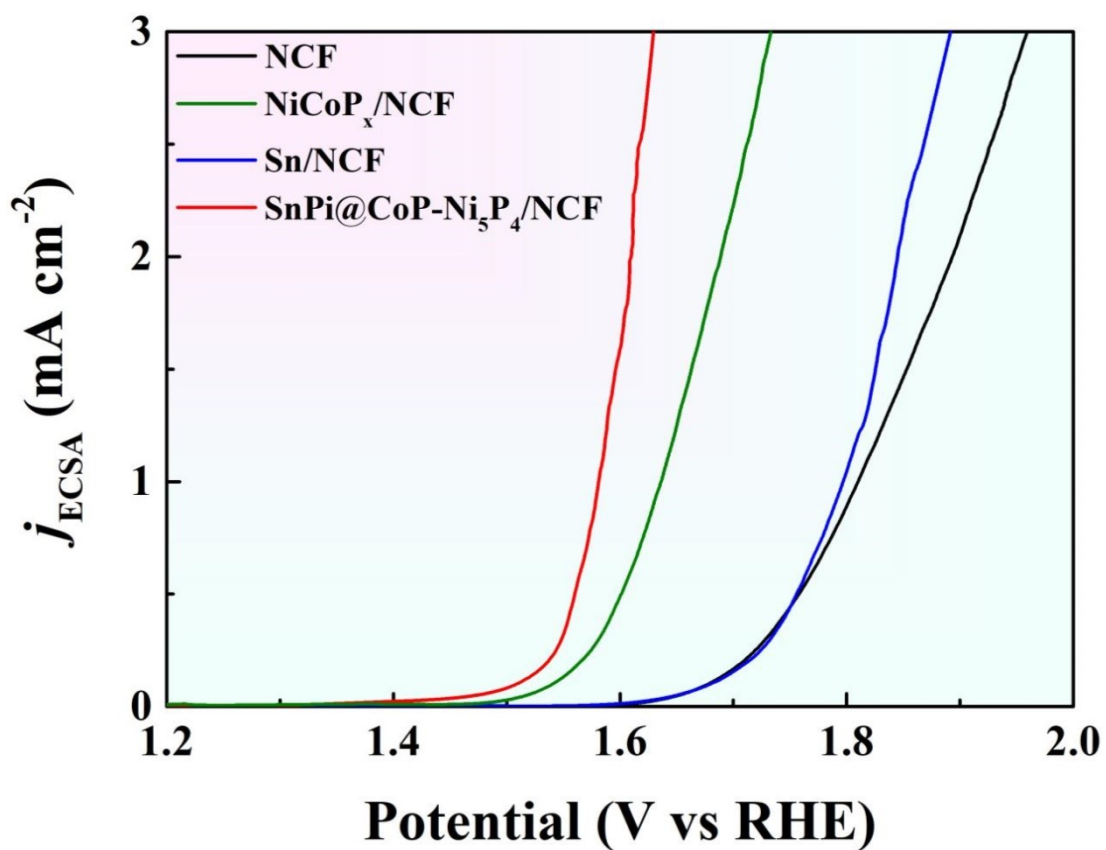

**Figure S17.** The LSV curves of the catalysts normalized with the electrochemical active surface area (ECSA =  $C_{\text{dl}}/C_s$ ).

### 3. Supplementary Tables

**Table S1.** The elemental contents of different electrocatalysts.

| Element                                         | Atomic% |       |       |       |       |       |
|-------------------------------------------------|---------|-------|-------|-------|-------|-------|
|                                                 | C 1s    | O 1s  | Ni 2p | Co 2p | Sn 4d | P 2p  |
| <b>SnPi@CoP-Ni<sub>5</sub>P<sub>4</sub>/NCF</b> | 23.43   | 46.15 | 2.46  | 10.34 | 3.59  | 14.03 |
| <b>After 50 h OER</b>                           | 15.32   | 58.81 | 2.58  | 20.83 | 0.26  | 2.21  |

**Table S2.** Comparison of electrocatalytic OER activity of various non-precious catalysts in 1.0 M KOH electrolyte.

| Catalysts                                              | $\eta$ (mV)                     | Tafel slope               | Stability (h)                   | References |
|--------------------------------------------------------|---------------------------------|---------------------------|---------------------------------|------------|
|                                                        | @<br>$J$ (mA cm <sup>-2</sup> ) |                           | @<br>$J$ (mA cm <sup>-2</sup> ) |            |
| SnPi@CoP-Ni <sub>5</sub> P <sub>4</sub> /NCF           | 180@10                          | 52 mV dec <sup>-1</sup>   | 50@10                           | This Work  |
|                                                        | 309@100                         |                           | 50@100                          |            |
|                                                        | 364@600                         |                           |                                 |            |
| Co <sub>0.85</sub> Se <sub>1-x</sub> @C                | 231@10                          | 57 mV dec <sup>-1</sup>   | 50@20                           | [S7]       |
|                                                        | 320@100                         |                           |                                 |            |
| Ir/Ni(OH) <sub>2</sub>                                 | 224@10                          | 41 mV dec <sup>-1</sup>   | 6@20                            | [S8]       |
|                                                        | 270@100                         |                           |                                 |            |
| CoCuFeMoOOH@Cu                                         | 199@10                          | 48.8 mV dec <sup>-1</sup> | 24@10                           | [S9]       |
|                                                        | 262@100                         |                           | 24@20                           |            |
|                                                        |                                 |                           | 24@50                           |            |
| Fe-Co <sub>3</sub> O <sub>4</sub>                      | 262@10                          | 43 mV dec <sup>-1</sup>   | 50@10                           | [S10]      |
|                                                        | 303@100                         |                           | 50@100                          |            |
| MoO <sub>3</sub> /Ni-NiO                               | 347@100                         | 60 mV dec <sup>-1</sup>   | N/A                             | [S11]      |
| NiS <sub>0.5</sub> Se <sub>0.5</sub>                   | 257@10                          | 61 mV dec <sup>-1</sup>   | 300@10                          | [S12]      |
|                                                        | 310@100                         |                           | 300@100                         |            |
|                                                        | 320@200                         |                           |                                 |            |
| NiFe MOF/NF                                            | 195@10                          | 44.1 mV dec <sup>-1</sup> | 40@10                           | [S13]      |
|                                                        | 241@100                         |                           |                                 |            |
| NiCo <sub>2-x</sub> Fe <sub>x</sub> O <sub>4</sub> NBs | 274@10                          | 42 mV dec <sup>-1</sup>   | 25@10                           | [S14]      |
|                                                        | 330@100                         |                           | 25@50                           |            |
|                                                        |                                 |                           |                                 |            |
| NiFe(OH) <sub>x</sub> /(Ni,Fe)Se <sub>2</sub> /CC      | 180@10                          | 42 mV dec <sup>-1</sup>   | 20@10                           | [S15]      |



|                                            |         |                            |         |       |
|--------------------------------------------|---------|----------------------------|---------|-------|
|                                            | 220@100 |                            |         |       |
|                                            | 230@300 |                            |         |       |
| <b>Sn-Ni<sub>5</sub>P<sub>4</sub></b>      | 173@10  | 46 mV dec <sup>-1</sup>    | 12@30   | [S16] |
|                                            | 310@100 |                            | 12@200  |       |
|                                            |         |                            | 12@500  |       |
|                                            | 294@10  |                            |         |       |
| <b>LC-CoOOH NAs/CFC</b>                    | 345@100 | 70.73mV dec <sup>-1</sup>  | 24@10   | [S17] |
|                                            | 370@200 |                            |         |       |
| <b>Fe<sub>x</sub>Ni<sub>y</sub>OOH-20F</b> | 280@100 | 66.7 mV dec <sup>-1</sup>  | 160@200 | [S18] |
|                                            | 348@500 |                            | 70@500  |       |
|                                            | 281@10  |                            |         |       |
| <b>NiFe-Se/CFP</b>                         | 382@100 | 40.93 mV dec <sup>-1</sup> | 20@10   | [S19] |
|                                            |         |                            |         |       |
| <b>a-NiHCF</b>                             | 210@50  | 53.45 mV dec <sup>-1</sup> | 30@160  | [S20] |
|                                            | 280@400 |                            | 30@242  |       |
|                                            | 309@800 |                            | 30@260  |       |
|                                            |         |                            | 30@287  |       |

**Table S3.** TOF for RuO<sub>2</sub>, SnPi@CoP-Ni<sub>5</sub>P<sub>4</sub>/NCF, and Sn/NCF catalysts at an overpotential of 160, 180, and 200 mV in the OER process.

| TOF s <sup>-1</sup>                             | 160 mV               | 180 V                | 200 mV               |
|-------------------------------------------------|----------------------|----------------------|----------------------|
| <b>RuO<sub>2</sub></b>                          | 5.9×10 <sup>-4</sup> | 7.6×10 <sup>-4</sup> | 8.2×10 <sup>-4</sup> |
| <b>SnPi@CoP-Ni<sub>5</sub>P<sub>4</sub>/NCF</b> | 1.1×10 <sup>-3</sup> | 1.3×10 <sup>-3</sup> | 1.4×10 <sup>-3</sup> |
| <b>Sn/NCF</b>                                   | 2.1×10 <sup>-4</sup> | 4.1×10 <sup>-4</sup> | 1.6×10 <sup>-4</sup> |

**Table S4.** The mass activity (MA) of OER active catalysts.

---

| <b>Sample</b>                                   | <b>MA</b><br><b>(mA g<sup>-1</sup>@200 mV)</b> |
|-------------------------------------------------|------------------------------------------------|
| <b>RuO<sub>2</sub></b>                          | 1.038×10 <sup>3</sup>                          |
| <b>SnPi@CoP-Ni<sub>5</sub>P<sub>4</sub>/NCF</b> | 1.716×10 <sup>3</sup>                          |
| <b>Sn/NCF</b>                                   | 2.07×10 <sup>2</sup>                           |

**Table S5.** Comparison of the amount of evolved O<sub>2</sub> on the electrodes containing various nonprecious metal catalysts.

| Catalysts                                        | Electrolytes                         | Current Density         | H <sub>2</sub> generation amount | References |
|--------------------------------------------------|--------------------------------------|-------------------------|----------------------------------|------------|
| <b>SnPi@CoP-Ni<sub>5</sub>P<sub>4</sub>/NCF</b>  | 1.0 M KOH                            | 10 mA cm <sup>-2</sup>  | 1670 μmol h <sup>-1</sup>        | This Work  |
| <b>NiFe-LDHs</b>                                 | 1.0 M KOH<br>+<br>0.5 M NaCl         | 10 mA cm <sup>-2</sup>  | 620 μmol h <sup>-1</sup>         | [S15]      |
| <b>Ce<sub>0.2</sub>-IrO<sub>2</sub>@NPC</b>      | 0.5 M H <sub>2</sub> SO <sub>4</sub> | 10 mA cm <sup>-2</sup>  | 183 μmol h <sup>-1</sup>         | [S16]      |
| <b>Ni/LDH-ZnO</b>                                | 1.0 M KOH                            | 10 mA cm <sup>-2</sup>  | 290 μmol h <sup>-1</sup>         | [S23]      |
| <b>NiFe-Se/CFP</b>                               | 1.0 M KOH                            | 10 mA cm <sup>-2</sup>  | 87 μmol h <sup>-1</sup>          | [S19]      |
| <b>MoO<sub>3</sub>/Ni-NiO</b>                    | 1.0 M KOH                            | 10 mA cm <sup>-2</sup>  | 176 μmol h <sup>-1</sup>         | [S11]      |
| <b>NiS<sub>0.5</sub>Se<sub>0.5</sub></b>         | 1.0 M KOH                            | 10 mA cm <sup>-2</sup>  | 187.5 μmol h <sup>-1</sup>       | [S12]      |
| <b>S-(Ni,Fe)OOH</b>                              | 1.0 M KOH<br>+<br>Seawater           | 500 mA cm <sup>-2</sup> | 1750 μmol h <sup>-1</sup>        | [S24]      |
| <b>δ-FeOOH/Ni<sub>3</sub>S<sub>2</sub>/NF</b>    | 1.0 M KOH                            | 10 mA cm <sup>-2</sup>  | 90 μmol h <sup>-1</sup>          | [S25]      |
| <b>Ni<sub>0.85</sub>Fe<sub>0.15</sub>PS</b>      | 1.0 M KOH                            | 10 mA cm <sup>-2</sup>  | 1674 μmol h <sup>-1</sup>        | [S26]      |
| <b>Fe@Fe<sub>x</sub>NiO/Ni@Ni<sub>y</sub>CoP</b> | 1.0 M KOH                            | 25 mA cm <sup>-2</sup>  | 111.6 μmol h <sup>-1</sup>       | [S27]      |
| <b>NiCoVP/NiFeVP</b>                             | 1.0 M KOH                            | 10 mA cm <sup>-2</sup>  | 35 μmol h <sup>-1</sup>          | [S28]      |
| <b>Gd-NiFe-LDH@CC</b>                            | 1.0 M KOH                            | 10 mA cm <sup>-2</sup>  | 196 μmol h <sup>-1</sup>         | [S29]      |
| <b>NiCoP-WO<sub>x</sub></b>                      | 1.0 M KOH                            | 10 mA cm <sup>-2</sup>  | 150 μmol h <sup>-1</sup>         | [S30]      |

## References

- S1 W. Kohn and L.J. Sham, *Phys. Rev.*, 1965, **140**, A1133.
- S2 G. Kresse and J. Hafner, *J. Phys. Condens. Matter*, 1994, **6**, 8245.
- S3 P.E. Blochl, *Phys. Rev. B*, 1994, **50**, 17953.
- S4 J. Perdew, K. Burke and M. Ernzerhof, *Phys. Rev. Lett.*, 1996, **77**, 3865.
- S5 S. Grimme, S. Ehrlich and L. Goerigk, *J. Comput. Chem.*, 2011, **32**, 1456–1465.
- S6 B. Hammer and J. K. Nørskov, *Adv. Catal.*, 2000, **45**, 71-129.
- S7 L. Zhang, C. J. Lu, F. Ye, R. L. J. Pang, Y. Liu, Z. Y. Wu, Z. P. Shao, Z. M. Sun and L. F. Hu, *Adv. Mater.*, 2021, **33**, 2007523.
- S8 G. Q. Zhao, P. Li, N. Y. Cheng, S. X. Dou and W. P. Sun, *Adv. Mater.*, 2020, **32**, 2000872.
- S9 L. J. Zhang, W. W. Cai and N. Z. Bao, *Adv. Mater.*, 2021, **33**, 2100745.
- S10 S. L. Zhang, B. Y. Guan, X. F. Lu, S. B. Xi, Y. H. Du and X. W. Lou, *Adv. Mater.*, 2020, **32**, 2002235.
- S11 X. P. Li, Y. Wang, J. J. Wang, Y. M. Da, J. F. Zhang, L. L. Li, C. Zhong, Y. D. Deng, X. P. Han and W. B. Hu, *Adv. Mater.*, 2020, **32**, 2003414.
- S12 Y. Wang, X. P. Li, M. M. Zhang, Y. G. Zhou, D. W. Rao, C. Zhong, J. F. Zhang, X. P. Han, W. B. Hu, Y. C. Zhang, K. Zaghbi, Y. S. Wang and Y. D. Deng, *Adv. Mater.*, 2020, **32**, 2000231.
- S13 J. Liang, X. Gao, B. Guo, Y. Ding, P. Yan, P. Guo, P. Tse and J. Liu, *Adv. Mater.*, 2021, **133**, 12880–12884.
- S14 Y. Huang, S. L. Zhang, X. F. Lu, Z. P. Wu, D. Y. Luan and X. W. Lou, *Angew. Chem. Int. Ed.*, 2021, **60**, 11841–11846.
- S15 C. C. Liu, Y. Han, L. B. Yao, L. M. Liang, J. Y. He, Q. Y. Hao, J. Zhang, Y. Li and H. Liu, *Small*, 2021, **17**, 2007334.

- S16 T. A. Shifa, K. Yusupov, G. Solomon, A. Gradone, R. Mazzaro, E. Cattaruzza and A. Vomiero, *ACS Catal.*, 2021, **11**, 4520–4529.
- S17 S. H. Ye, J. P. Wang, J. Hu, Z. D. Chen, L. R. Zheng, Y. H. Fu, Y. Q. Lei, X. Z. Ren, C. X. He, Q. L. Zhang and J. H. Liu, *ACS Catal.*, 2021, **11**, 6104–6112.
- S18 J. W. Xiao, A. M. Oliveira, L. Wang, Y. Zhao, T. Wang, J. H. Wang, B. P. Setzler and Y. S. Yan, *ACS Catal.*, 2021, **11**, 264–270.
- S19 Y. J. Guo, C. R. Zhang, J. H. Zhang, K. Dastafkan, K. Wang, C. Zhao and Z. Q. Shi, *ACS Sustain. Chem. Eng.*, 2021, **9**, 2047–2056.
- S20 X. Xu, T. Wang, L. Su, Y. Zhang, L. Dong and X. Miao, *Chem. Eng.*, 2021, **9**, 5693–5704.
- S21 Q. Q. Tu, W. W. Liu, M. Jiang, W. J. Wang, Q. Kang, P. C. Wang, W. J. Zhou and F. M. Zhou, *ACS Appl. Energy Mater.*, 2021, **4**, 4630–4637.
- S22 Y. H. Wang, S. Y. Hao, X. N. Liu, Q. Q. Wang, Z. W. Su, L. C. Lei and X. W. Zhang, *ACS Appl. Mater. Interfaces*, 2020, **12**, 37006–37012.
- S23 Y. Luo, Y. H. Wu, D. H. Wu, C. Huang, D. Z. Xiao, H. Y. Chen, S. L. Zheng and P. K. Chu, *ACS Appl. Mater. Interfaces*, 2020, **12**, 42850–42858.
- S24 L. Yu, L. B. Wu, B. McElhenny, S. W. Song, D. Luo, F. G. Zhang, Y. Yu, S. Chen and Z. F. Ren, *Energy Environ. Sci.*, 2020, **13**, 3439–3446.
- S25 X. F. Ji, C. Q. Cheng, Z. H. Zang, L. L. Li, X. Li, Y. H. Cheng, X. J. Yang, X. F. Yu, Z. M. Lu, X. H. Zhang and H. Liu, *J. Mater. Chem. A*, 2020, **8**, 21199–21207.
- S26 W. F. Peng, J. K. Li, K. Q. Shen, L. R. Zheng, H. Tang, Y. T. Gong, J. S. Zhou, N. Chen, S. J. Zhao, M. Y. Chen, F. M. Gao and H. Y. Gou, *J. Mater. Chem. A*, 2020, **8**, 23580–23589.
- S27 Q. J. Che, X. Y. Zhou, Q. C. Liu, Y. Tan and Q. Li, *J. Mater. Chem. A*, 2021, **9**, 5833–5847.

S28 Y. Jeung, H. Jung, D. Kim, H. Roh, C. Lim, J. Han and K. Yong, *J. Mater. Chem. A*, 2021, **20**, 12203–12213

S29 M. Li, H. Li, X. C. Jiang, M. Q. Jiang, X. Zhan, G. T. Fu, J. M. Lee and Y. W. Tang, *J. Mater. Chem. A*, 2021, **9**, 2999–3006.

S30 D. Kim, Y. Jeong, H. Roh, C. Lim and K. Yong, *J. Mater. Chem. A*, 2021, **9**, 10909–10920.
